# Supplementary material for: Microwave-assisted fatty acid methyl ester production from soybean oil by Novozym 435
Source: Royal Society of Chemistry journal article supplement (doi:10.1039/b927073f), 2010-01-01

### Separation of soybean oil FAMES by GC.

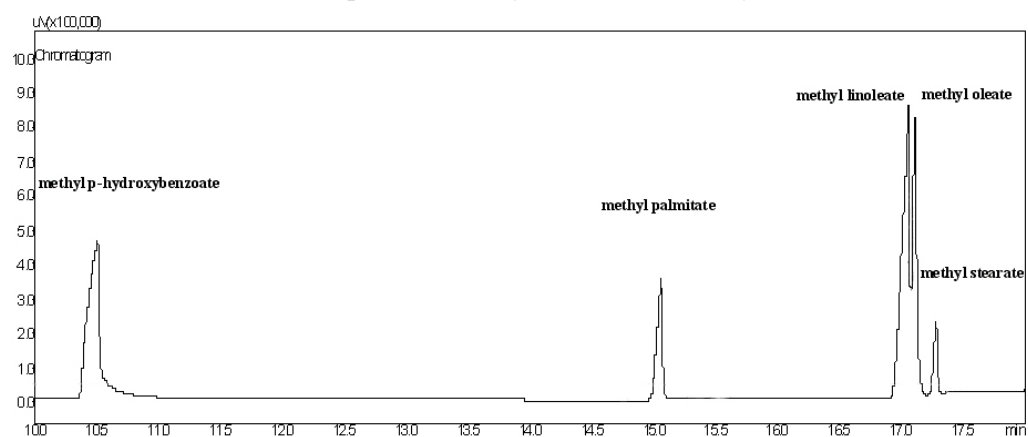

**Scheme 1. Transesterification of soybean oil and methanol with Novozym 435 under microwave irradiation.**

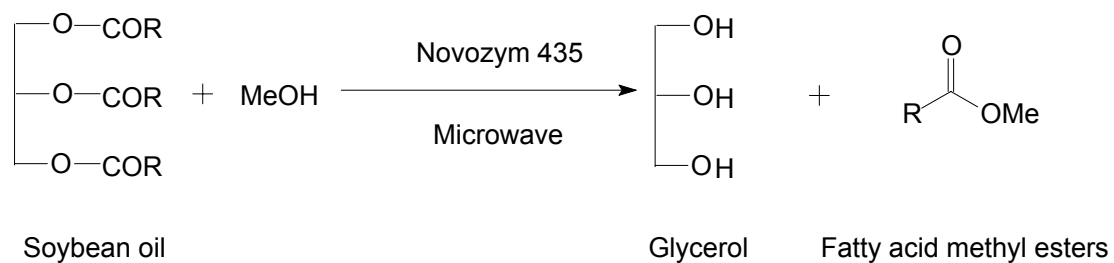

**Fig. 1. Comparison of reaction process without enzyme under microwave irradiation (◆), with enzyme under microwave irradiation (■), and with enzyme under conventional heating (▲). Conditions:** Reactions were carried out in *tert*-amyl alcohol (40 ml), soybean oil (40 mmol), methanol (240 mmol), Novozym 435 (3% based on the oil weight), water activity of 0.53 at 40°C and 200 rpm under microwave irradiation and conventional heating, respectively.

| Reaction time (h) | FAME yield without enzyme under Microwave irradiation (%) | FAME yield with enzyme under Microwave irradiation (%) | FAME yield with enzyme under conventional heating (%) |
|-------------------|-----------------------------------------------------------|--------------------------------------------------------|-------------------------------------------------------|
| 0                 | 0                                                         | 0                                                      | 0                                                     |
| 2                 | 0                                                         | 28 ± 0.8                                               | 19 ± 0.6                                              |
| 4                 | 0                                                         | 51 ± 1.5                                               | 33 ± 1.0                                              |
| 6                 | 0                                                         | 65 ± 2.0                                               | 46 ± 1.4                                              |
| 8                 | 0                                                         | 79 ± 2.4                                               | 57 ± 1.7                                              |
| 10                | 0                                                         | 88 ± 2.6                                               | 66 ± 2.0                                              |
| 12                | 0                                                         | 95 ± 2.8                                               | 75 ± 2.3                                              |
| 16                | 0                                                         | 95 ± 2.9                                               | 85 ± 2.6                                              |
| 20                | 0                                                         | 96 ± 3.0                                               | 92 ± 2.7                                              |
| 24                | 0                                                         | 96 ± 3.0                                               | 95 ± 2.9                                              |

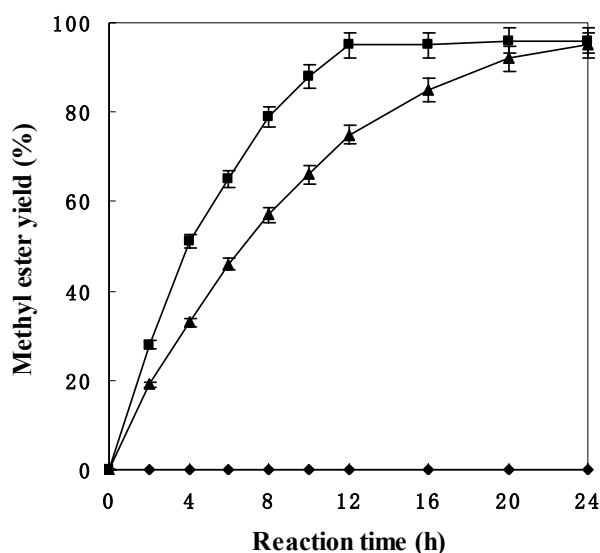

**Fig. 2. Effect of water activity on FAME production. Conditions:** Reactions were carried out in *tert*-amyl alcohol (40 ml), soybean oil (40 mmol), methanol (240 mmol), Novozym 435 (3% based on the oil weight) at 40°C and 200 rpm under microwave irradiation in 2 h. The water activity varied from 0.06 to 0.97.

| Water activity | Enzyme activity ( $\mu\text{mol}/\text{min}\cdot\text{g}$ ) |
|----------------|-------------------------------------------------------------|
| 0              | 0                                                           |
| 0.06           | $124 \pm 4$                                                 |
| 0.11           | $211 \pm 6$                                                 |
| 0.24           | $256 \pm 8$                                                 |
| 0.33           | $297 \pm 9$                                                 |
| 0.53           | $335 \pm 11$                                                |
| 0.75           | $167 \pm 5$                                                 |
| 0.97           | $75 \pm 2$                                                  |

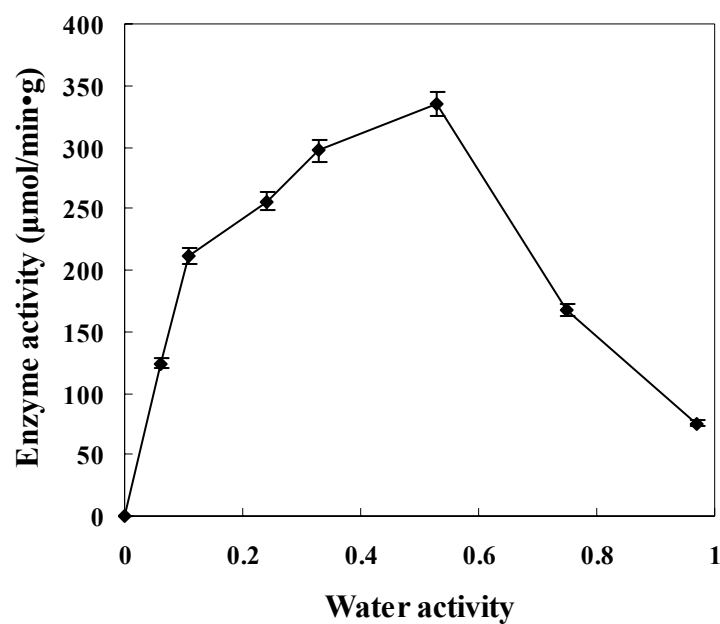

**Figure. 3. Effect of *tert*-amyl alcohol concentration on FAME production. *Conditions:* Reactions were carried out in soybean oil (40 mmol), methanol (240 mmol), Novozym 435 (3% based on the oil weight) and water activity of 0.53 and 200 rpm at 40°C under microwave irradiation in 2 h. The *tert*-amyl alcohol/oil volume ratio varied from 0 to 4.**

| <i>Tert</i> -amyl alcohol/oil(v/v) | Enzyme activity ( $\mu\text{mol}/\text{min}\cdot\text{g}$ ) |
|------------------------------------|-------------------------------------------------------------|
| 0                                  | 49 $\pm$ 1                                                  |
| 0.25                               | 164 $\pm$ 5                                                 |
| 0.5                                | 255 $\pm$ 8                                                 |
| 0.75                               | 298 $\pm$ 9                                                 |
| 1                                  | 336 $\pm$ 11                                                |
| 1.5                                | 330 $\pm$ 10                                                |
| 2                                  | 323 $\pm$ 10                                                |
| 4                                  | 318 $\pm$ 9                                                 |

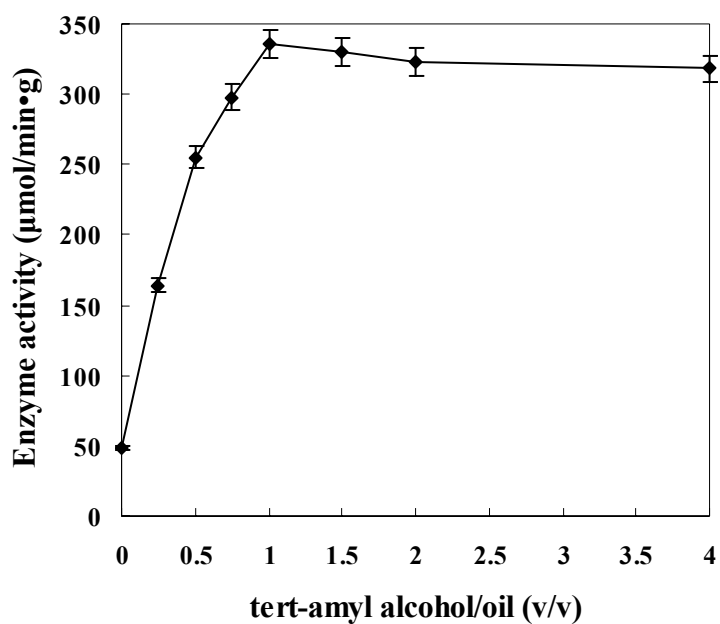

**Fig. 4. Effect of substrate ratio on FAME production. *Conditions:*** Reactions were carried out in *tert*-amyl alcohol (40 ml), soybean oil (40 mmol), Novozym 435 (3% based on the oil weight) and water activity of 0.53 at 40°C and 200 rpm under microwave irradiation in 2 h. The molar ratio of methanol/oil varied from 3 to 18.

| Methanol/Oil molar ratio (mol/mol) | Enzyme activity ( $\mu\text{mol}/\text{min}\cdot\text{g}$ ) |
|------------------------------------|-------------------------------------------------------------|
| 3                                  | $309 \pm 10$                                                |
| 6                                  | $325 \pm 11$                                                |
| 9                                  | $285 \pm 9$                                                 |
| 12                                 | $173 \pm 5$                                                 |
| 18                                 | $39 \pm 1$                                                  |

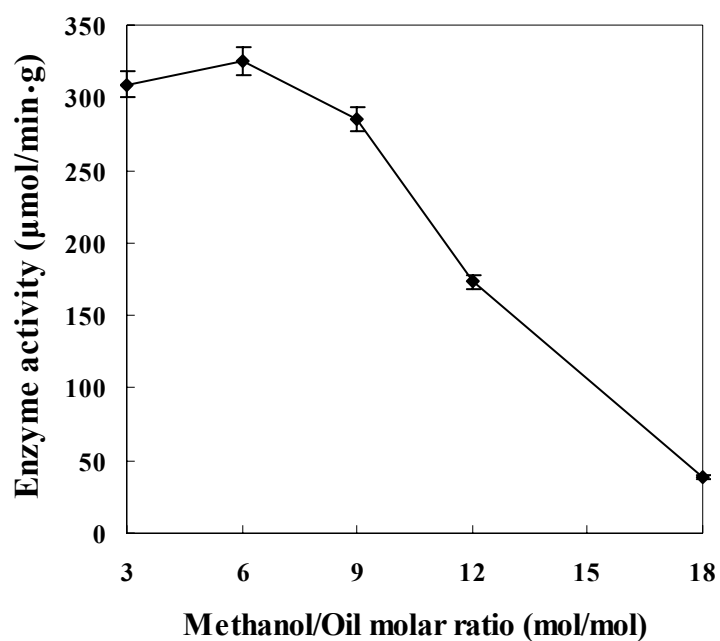

**Fig. 5. Linear regression curves obtained from logarithmic representation of residual activity *versus* preincubation time.**

| Time | $\text{Log}(A/A^0 \times 100)$ |
|------|--------------------------------|
| 0    | $2 \pm 0.06$                   |
| 1    | $1.94 \pm 0.05$                |
| 5    | $1.89 \pm 0.05$                |
| 10   | $1.71 \pm 0.04$                |
| 30   | $1 \pm 0.03$                   |

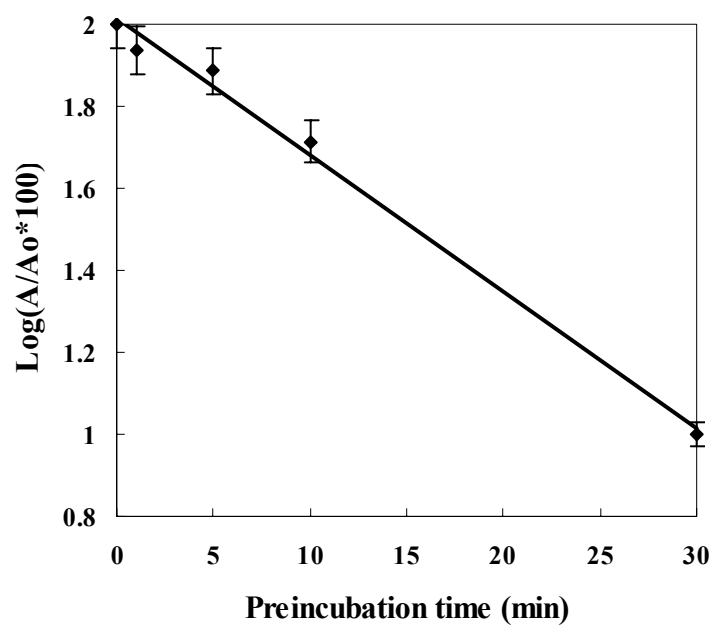

**Fig. 6. Effect of enzyme dosage on FAME production. Conditions: Reactions were carried out in *tert*-amyl alcohol (40 ml), soybean oil (40 mmol), methanol (240 mmol), water activity of 0.53 at 40°C and 200 rpm under microwave irradiation in 2 h. The amount of enzyme varied from 0 to 4% based on the oil weight.**

| Enzyme dosage (%) | FAME yield (%) |
|-------------------|----------------|
| 0                 | 0              |
| 0.5               | 3 ± 0.1        |
| 1                 | 11 ± 0.3       |
| 1.5               | 18 ± 0.5       |
| 2                 | 24 ± 0.7       |
| 2.5               | 29 ± 0.8       |
| 3                 | 33 ± 0.9       |
| 3.5               | 34 ± 1.0       |
| 4                 | 35 ± 1.0       |

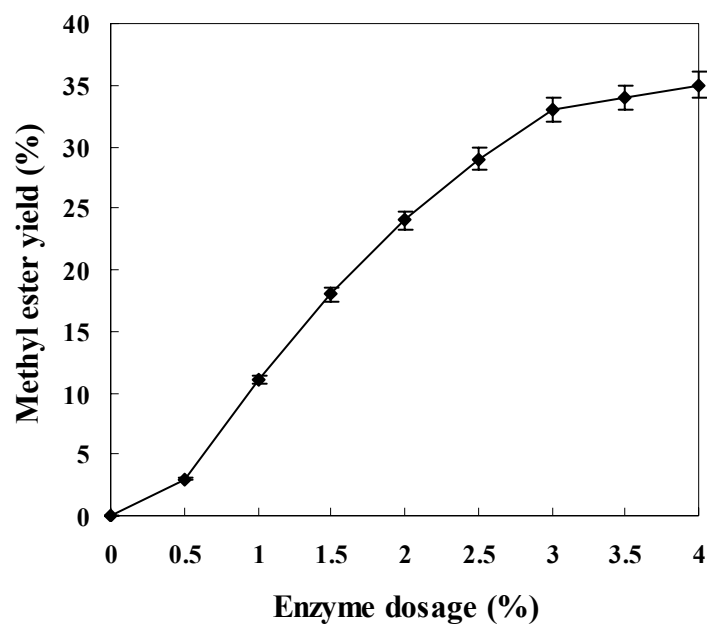



**Fig. 7. Effect of temperature on FAME production. Conditions:** Reactions were carried out in *tert*-amyl alcohol (40 ml), soybean oil (40 mmol), methanol (240 mmol), Novozym 435 (3% based on the oil weight) and water activity of 0.53 and 200 rpm under microwave irradiation in 2 h. Temperature varied from 30 to 70°C.

| Temperature (°C) | Enzyme activity ( $\mu\text{mol}/\text{min}\cdot\text{g}$ ) |
|------------------|-------------------------------------------------------------|
| 30               | $97 \pm 3$                                                  |
| 40               | $322 \pm 10$                                                |
| 50               | $267 \pm 8$                                                 |
| 60               | $256 \pm 7$                                                 |
| 70               | $86 \pm 3$                                                  |

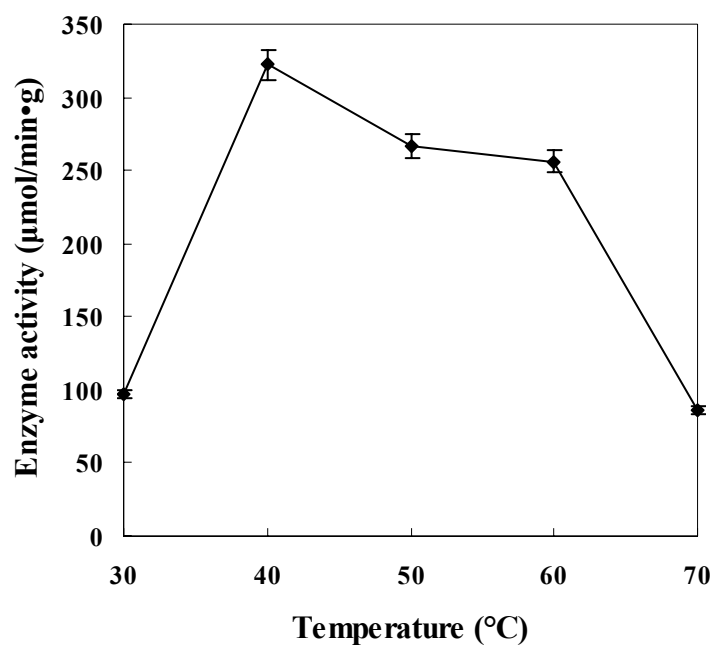

**Fig. 8. Reusability of enzyme on FAME production. Conditions:** Each cycle was carried out in *tert*-amyl alcohol (40 ml), soybean oil (40 mmol), methanol (240 mmol), Novozym 435 (3% based on the oil weight) and water activity of 0.53 at 40°C and 200 rpm for 2 h under microwave irradiation (◆) and under conventional heating (■).

| Cycle number | Enzyme activity ( $\mu\text{mol}/\text{min}\cdot\text{g}$ ) under microwave irradiation | Enzyme activity ( $\mu\text{mol}/\text{min}\cdot\text{g}$ ) under conventional heating |
|--------------|-----------------------------------------------------------------------------------------|----------------------------------------------------------------------------------------|
| 1            | $338 \pm 10$                                                                            | $229 \pm 7$                                                                            |
| 2            | $335 \pm 10$                                                                            | $225 \pm 6$                                                                            |
| 3            | $333 \pm 10$                                                                            | $219 \pm 6$                                                                            |
| 4            | $330 \pm 10$                                                                            | $213 \pm 5$                                                                            |
| 5            | $325 \pm 9$                                                                             | $206 \pm 5$                                                                            |

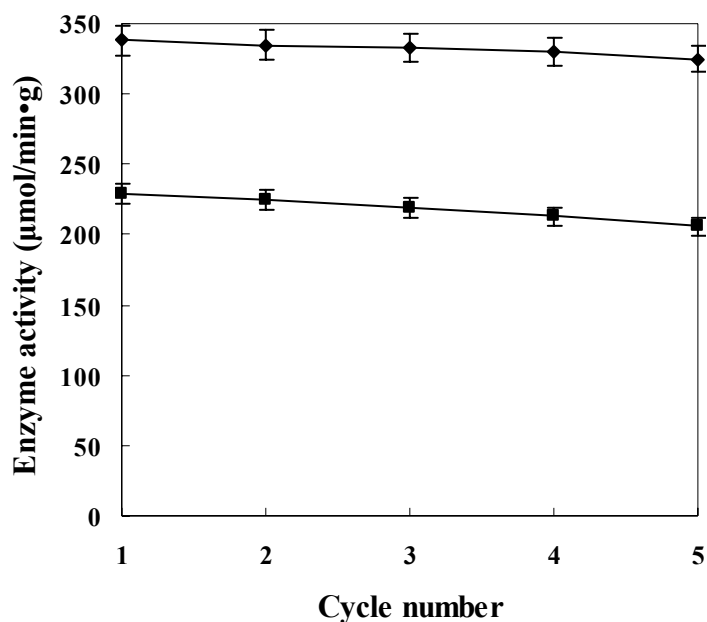

Supplement: b927073f.pdf [file b927073f.pdf]
